# Supplementary material for: Measuring Implementation Strength for Integrated Community Case Management in Malawi: Results from a National Cell Phone Census
Source: PubMed Central journal article supplement (PMC4596612; doi:10.4269/ajtmh.14-0797), 2015-10-07
Supplement: SD9.pdf [file SD9.pdf]

SUPPLEMENTAL TABLE 1  
Mean number of sick children seen in previous 7 days by HSAs providing iCCM services

| Zone         | District     | HSAs working in iCCM | 2c. % Providing iCCM services (saw sick child in last 7 days) |             | No. of sick children treated in previous week <sup>1</sup> |             |
|--------------|--------------|----------------------|---------------------------------------------------------------|-------------|------------------------------------------------------------|-------------|
|              |              | <i>n</i>             | <i>n</i>                                                      | %           | Mean                                                       | SD          |
| Northern     | Chitipa      | 46                   | 37                                                            | 80.4        | 15.9                                                       | 16.1        |
|              | Karonga      | 65                   | 52                                                            | 80.0        | 12.1                                                       | 13.6        |
|              | Likoma       | 6                    | 5                                                             | 83.3        | 3.4                                                        | 2.3         |
|              | Mzimba North | 85                   | 80                                                            | 94.1        | 14.5                                                       | 10.7        |
|              | Mzimba South | 197                  | 172                                                           | 87.3        | 15.9                                                       | 12.8        |
|              | Nkhata Bay   | 54                   | 50                                                            | 92.6        | 22.3                                                       | 17.2        |
| Central      | Rumphi       | 40                   | 34                                                            | 85.0        | 26.2                                                       | 24.3        |
|              | Dedza        | 91                   | 86                                                            | 94.5        | 17.6                                                       | 12.8        |
|              | Dowa         | 245                  | 206                                                           | 84.1        | 10.8                                                       | 7.8         |
|              | Kasungu      | 124                  | 116                                                           | 93.5        | 21.6                                                       | 14.6        |
|              | Lilongwe     | 127                  | 114                                                           | 89.8        | 20.9                                                       | 19.5        |
|              | Mchinji      | 120                  | 106                                                           | 88.3        | 16.7                                                       | 11.7        |
|              | Nkhotakota   | 135                  | 126                                                           | 93.3        | 22.3                                                       | 19.8        |
|              | Ntcheu       | 129                  | 120                                                           | 93.0        | 11.4                                                       | 8.1         |
|              | Ntchisi      | 97                   | 82                                                            | 84.5        | 14.4                                                       | 9.2         |
|              | Salima       | 62                   | 54                                                            | 87.1        | 20.1                                                       | 16.6        |
| Southern     | Balaka       | 96                   | 77                                                            | 80.2        | 13.6                                                       | 8.3         |
|              | Blantyre     | 95                   | 68                                                            | 71.6        | 16.7                                                       | 11.3        |
|              | Chikwawa     | 72                   | 56                                                            | 77.8        | 15.9                                                       | 13.0        |
|              | Chiradzulu   | 40                   | 34                                                            | 85.0        | 13.4                                                       | 9.1         |
|              | Machinga     | 262                  | 150                                                           | 57.3        | 12.9                                                       | 8.8         |
|              | Mangochi     | 55                   | 47                                                            | 85.5        | 25.6                                                       | 31.2        |
|              | Mulanje      | 71                   | 58                                                            | 81.7        | 15.9                                                       | 9.3         |
|              | Mwanza       | 68                   | 35                                                            | 51.5        | 8.2                                                        | 5.8         |
|              | Neno         | 67                   | 39                                                            | 58.2        | 13.2                                                       | 11.4        |
|              | Nsanje       | 68                   | 59                                                            | 86.8        | 16.4                                                       | 11.9        |
|              | Phalombe     | 58                   | 51                                                            | 87.9        | 19.6                                                       | 15.0        |
|              | Thyolo       | 320                  | 195                                                           | 60.9        | 8.4                                                        | 7.7         |
|              | Zomba        | 497                  | 302                                                           | 60.8        | 11.1                                                       | 10.1        |
| <b>TOTAL</b> |              | <b>3,392</b>         | <b>2,611</b>                                                  | <b>77.0</b> | <b>15.1</b>                                                | <b>13.6</b> |

HSAs = Health Surveillance Assistants; iCCM = Integrated Community Case Management; SD = standard deviation.
